# Supplementary figures and images for: Improving Survival in Cardiogenic Shock—A Propensity Score-Matched Analysis of the Impact of an Institutional Allocation Protocol to Short-Term Mechanical Circulatory Support
Source: MDPI journal article supplement (doi:10.3390/life12111931), 2022-11-19

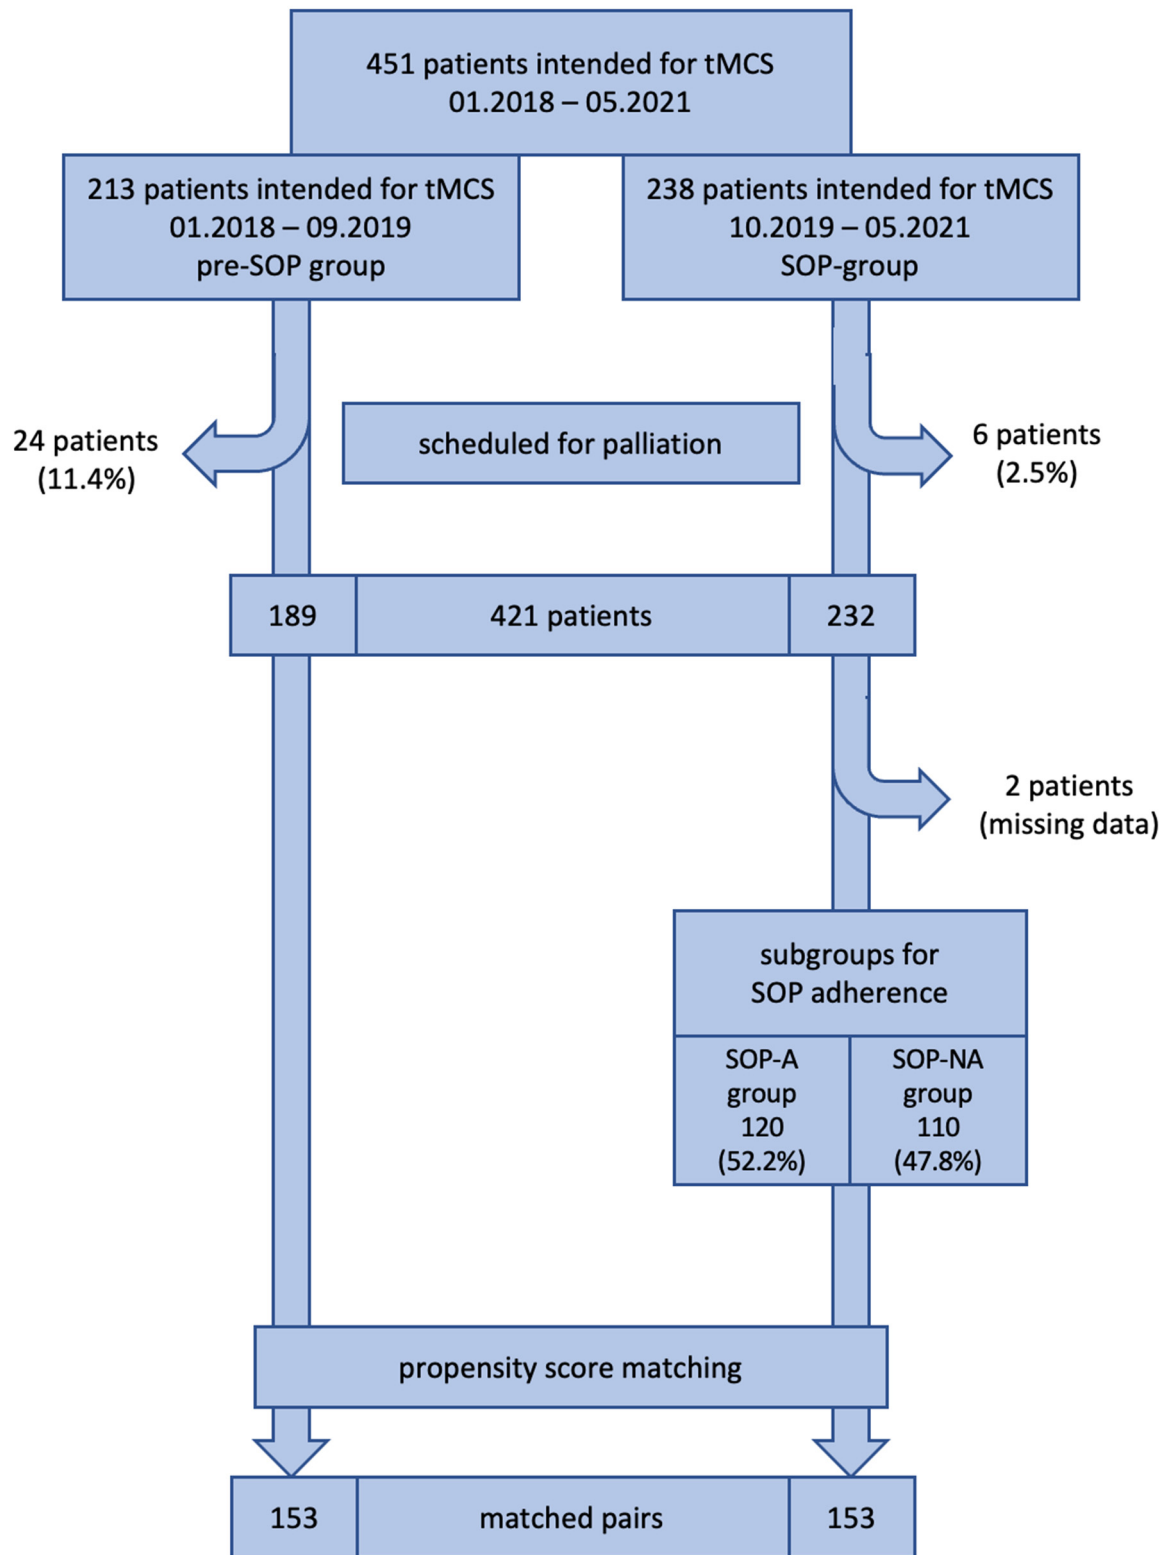

**Figure S1.** Patient selection.

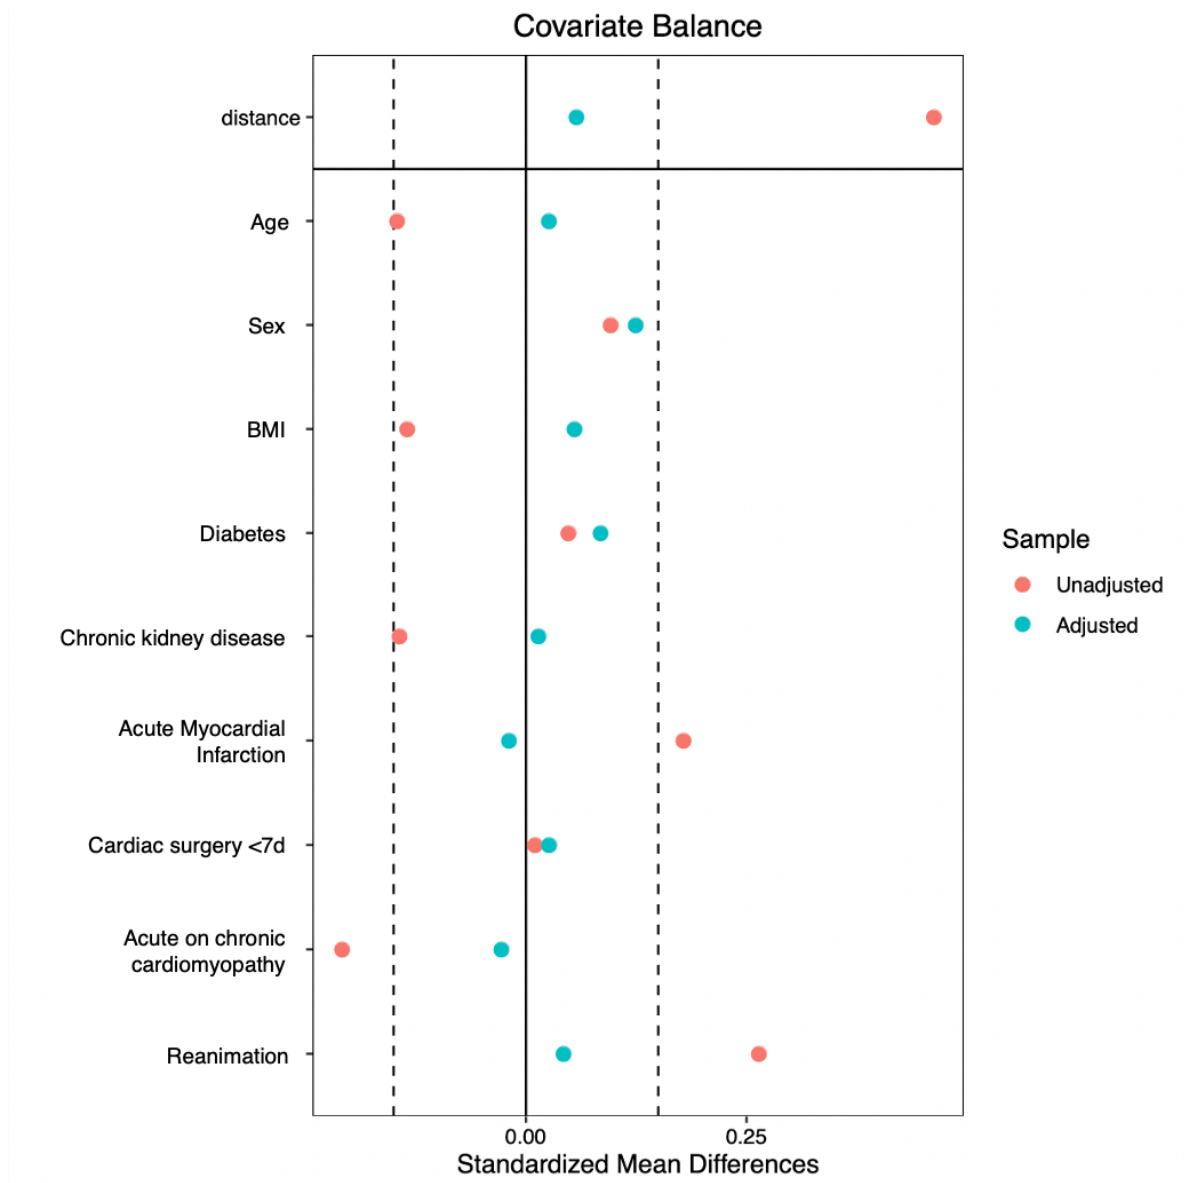

**Figure S2.** Covariate balance plot.

Supplement: s1 [file s1]
